# Supplementary material for: Composition of IR64 grain surface as characterized by Static Time-of-Flight Secondary ion Mass Spectrometry
Source: Research Square preprint supplement (doi:10.21203/rs.3.rs-8501560/v1), 2026-02-09
Supplement: Supplementary file 1 [file 4d204c1e62ba061564fd7a5c.docx]

**Supplementary Table 1.** TOF-SIMS peak assignments for milled IR64 rice in positive mode

| Peak Label | Mass | Area Norm. By Total Ion Intensity |
| --- | --- | --- |
|  |  |  |
| C+ | 12.00 | 1.59E-04 |
| CH+ | 13.01 | 1.67E-04 |
| CH_2+ | 14.01 | 7.60E-04 |
| CH_3+ | 15.02 | 2.30E-03 |
| NH_4+ | 18.04 | 6.91E-04 |
| H_3O+ | 19.02 | 1.64E-03 |
| Na+ | 22.99 | 7.70E-05 |
| Mg+ | 23.98 | 2.82E-06 |
| C_2H_2+ | 26.01 | 1.20E-03 |
| C_2H_3+ | 27.02 | 1.59E-02 |
| Si+ | 27.97 | 2.50E-03 |
| C_2H_4+ | 28.03 | 2.69E-03 |
| SiH+ | 28.98 | 1.05E-03 |
| CHO+ | 29.00 | 2.21E-03 |
| C_2H_5+ | 29.04 | 2.07E-02 |
| CH_4N+ | 30.04 | 1.83E-03 |
| CH_3O+ | 31.02 | 6.31E-03 |
| C_3H+ | 37.00 | 8.97E-05 |
| C_3H_2+ | 38.01 | 4.73E-04 |
| K+ | 38.97 | 8.47E-03 |
| C_3H_3+ | 39.02 | 1.22E-02 |
| Ca+ | 39.96 | 2.05E-05 |
| Ca+ | 39.96 | 2.05E-05 |
| C_3H_4+ | 40.03 | 1.77E-03 |
| ^41K+ | 40.96 | 6.62E-04 |
| C_3H_5+ | 41.04 | 4.70E-02 |
| C_3H_6+ | 42.04 | 5.01E-03 |
| C_2H_3O+ | 43.02 | 9.01E-03 |
| C_3H_7+ | 43.06 | 4.34E-02 |
| C_3H_8+ | 44.05 | 5.86E-03 |
| C_2H_5O+ | 45.03 | 8.79E-03 |
| CH_3O_2+ | 47.01 | 1.21E-03 |
| C_4H_3+ | 51.02 | 1.38E-03 |
| C_4H_4+ | 52.02 | 1.01E-03 |
| C_4H_5+ | 53.04 | 9.29E-03 |
| C_4H_6+ | 54.04 | 6.86E-03 |
| C_2H_4C_2H_3+ | 55.05 | 4.61E-02 |
| C_4H_8+ | 56.06 | 5.67E-03 |
| C_4H_9+ | 57.07 | 2.05E-02 |
| C_3H_8N+ | 58.06 | 6.55E-03 |
| C_3H_7O+ | 59.03 | 5.23E-03 |
| C_5H_7+ | 67.05 | 2.49E-02 |
| C_5H_9+ | 69.07 | 2.90E-02 |
| C_5H_11+ | 71.09 | 8.20E-03 |
| C_4H_9O+ | 73.05 | 5.17E-02 |
| C_6H_7+ | 79.05 | 1.07E-02 |
| C_6H_9+ | 81.07 | 1.80E-02 |
| C_7H_7+ | 91.05 | 1.06E-02 |
| C_7H_9+ | 93.08 | 7.12E-03 |
| C_7H_11+ | 95.09 | 1.12E-02 |
| C_8H_19O_2+ | 147.11 | 8.46E-03 |
| C_12H_15+ | 159.11 | 1.05E-03 |
| C_12H_17+ | 161.13 | 6.65E-04 |
| C_13H_5O+ | 177.08 | 2.56E-04 |
| C_9H_12O_4+ | 184.06 | 2.92E-03 |
| C_11H_11O_4+ | 207.07 | 8.91E-04 |
| C_16H_13O+ | 221.14 | 5.56E-04 |
| 281.09 u | 281.09 | 3.81E-04 |
| 297.23 u | 297.23 | 1.54E-04 |
| 311.23 u | 311.23 | 1.04E-04 |
| 313.26 u | 313.26 | 3.46E-04 |
| 336.22 u | 336.22 | 3.61E-05 |
| 337.25 u | 337.25 | 2.30E-04 |
| 338.28 u | 338.28 | 4.65E-04 |
| 339.27 u | 339.27 | 3.81E-04 |
| 340.27 u | 340.27 | 4.29E-04 |
| 341.28 u | 341.28 | 1.72E-04 |
| 381.26 u | 381.26 | 4.88E-05 |
| 383.29 u | 383.29 | 7.77E-05 |
| 395.28 u | 395.28 | 7.29E-05 |
| 396.30 u | 396.30 | 6.54E-05 |
| 397.29 u | 397.29 | 1.29E-04 |
| 398.28 u | 398.28 | 5.94E-05 |

**Supplementary Table 2.** TOF-SIMS peak assignments for milled IR64 rice in negative mode

| Peak Label | Mass | Area Norm. By Total Ion Intensity |
| --- | --- | --- |
|  |  |  |
| C- | 12.00 | 1.50E-02 |
| CH- | 13.01 | 4.67E-02 |
| CH_2- | 14.02 | 8.09E-03 |
| CH_3- | 15.03 | 2.43E-04 |
| O- | 15.99 | 5.26E-02 |
| OH- | 17.00 | 4.96E-02 |
| F- | 19.00 | 3.37E-04 |
| C_2- | 24.00 | 6.71E-03 |
| C_2H- | 25.01 | 2.65E-02 |
| C_2H_2- | 26.01 | 3.87E-03 |
| C_2H_3- | 27.03 | 6.87E-04 |
| Si- | 27.97 | 3.44E-04 |
| SiH- | 28.98 | 2.27E-04 |
| CHO- | 29.00 | 7.62E-04 |
| SiH_2- | 29.99 | 6.22E-05 |
| CH_3O- | 31.02 | 3.68E-04 |
| O_2- | 31.99 | 2.98E-04 |
| Cl- | 34.97 | 3.18E-04 |
| C_3- | 36.00 | 6.25E-04 |
| ^37Cl- | 36.97 | 1.04E-04 |
| C_3H- | 37.01 | 7.66E-04 |
| C_3H_2- | 38.02 | 1.15E-03 |
| C_3H_3- | 39.02 | 5.48E-04 |
| C_2O- | 39.99 | 5.13E-04 |
| C_3H_4- | 40.02 | 2.57E-04 |
| C_2HO- | 41.00 | 6.26E-03 |
| C_2H_3O- | 43.02 | 5.81E-03 |
| CHO_2- | 45.00 | 1.82E-02 |
| C_4- | 48.00 | 2.00E-04 |
| C_4H- | 49.01 | 9.41E-04 |
| C_4H_3- | 51.02 | 8.13E-04 |
| C_3H_3O- | 55.02 | 4.05E-03 |
| C_2H_2O_2- | 58.00 | 1.23E-02 |
| C_2H_3O_2- | 59.01 | 2.46E-02 |
| C_3H_3O_2- | 71.01 | 2.35E-02 |
| C_2HO_3- | 72.99 | 6.45E-03 |
| C_6HN- | 87.00 | 1.13E-02 |
| C_6H_7O_5- | 159.03 | 7.35E-04 |
| C_6H_9O_5- | 161.05 | 5.98E-04 |
| C_14H_9O- | 193.07 | 5.96E-05 |
| C_16H_13O- | 221.08 | 1.71E-03 |
| 253.17 u | 253.17 | 2.22E-04 |
| C_15H_29NO_2- | 255.19 | 1.76E-03 |
| 256.19 u | 256.19 | 3.23E-04 |
| 279.18 u | 279.18 | 9.95E-04 |
| 280.17 u | 280.17 | 1.34E-04 |
| 281.20 u | 281.20 | 1.50E-03 |
| 282.20 u | 282.20 | 3.02E-04 |
| 283.21 u | 283.21 | 2.85E-04 |
| 336.24 u | 336.24 | 8.32E-05 |
| 383.18 u | 383.18 | 1.79E-04 |

**Supplementary Table 3.** TOF-SIMS peak assignments for brown IR64 rice in positive mode

| Peak Label | Mass | Spectra: Area Norm. By Total Ion Intensity: |
| --- | --- | --- |
|  |  | [spec] IR64B Center_+_run2_2 |
| C+ | 12.00 | 3.75E-04 |
| CH+ | 13.01 | 2.04E-04 |
| CH_2+ | 14.01 | 9.83E-04 |
| CH_3+ | 15.02 | 2.36E-03 |
| NH_4+ | 18.04 | 4.18E-04 |
| H_3O+ | 19.02 | 3.56E-04 |
| Na+ | 22.99 | 8.89E-05 |
| Mg+ | 23.98 | 3.29E-05 |
| C_2H_2+ | 26.01 | 1.29E-03 |
| C_2H_3+ | 27.02 | 1.50E-02 |
| Si+ | 27.97 | 4.94E-03 |
| C_2H_4+ | 28.03 | 2.00E-03 |
| SiH+ | 28.98 | 1.59E-03 |
| CHO+ | 29.00 | 6.31E-04 |
| C_2H_5+ | 29.04 | 1.61E-02 |
| CH_4N+ | 30.04 | 1.01E-03 |
| CH_3O+ | 31.02 | 1.50E-03 |
| C_3H+ | 37.00 | 8.82E-05 |
| C_3H_2+ | 38.01 | 4.37E-04 |
| K+ | 38.97 | 1.51E-02 |
| C_3H_3+ | 39.02 | 1.18E-02 |
| Ca+ | 39.96 | 1.20E-04 |
| Ca+ | 39.96 | 1.20E-04 |
| C_3H_4+ | 40.03 | 1.48E-03 |
| ^41K+ | 40.97 | 1.20E-03 |
| C_3H_5+ | 41.04 | 3.62E-02 |
| C_3H_6+ | 42.04 | 3.46E-03 |
| C_2H_3O+ | 43.02 | 4.05E-03 |
| C_3H_7+ | 43.05 | 4.10E-02 |
| C_3H_8+ | 44.05 | 4.20E-03 |
| C_2H_5O+ | 45.04 | 3.29E-03 |
| CH_3O_2+ | 47.01 | 3.58E-04 |
| C_4H_3+ | 51.02 | 1.23E-03 |
| C_4H_4+ | 52.03 | 8.11E-04 |
| C_4H_5+ | 53.04 | 6.90E-03 |
| C_4H_6+ | 54.04 | 4.86E-03 |
| C_2H_4C_2H_3+ | 55.05 | 4.26E-02 |
| C_4H_8+ | 56.06 | 4.32E-03 |
| C_4H_9+ | 57.07 | 1.93E-02 |
| C_3H_8N+ | 58.06 | 6.63E-03 |
| C_3H_7O+ | 59.03 | 3.08E-03 |
| C_5H_7+ | 67.05 | 2.02E-02 |
| C_5H_9+ | 69.07 | 3.65E-02 |
| C_5H_11+ | 71.09 | 8.99E-03 |
| C_4H_9O+ | 73.05 | 2.92E-02 |
| C_6H_7+ | 79.05 | 8.80E-03 |
| C_6H_9+ | 81.07 | 1.88E-02 |
| C_7H_7+ | 91.06 | 1.06E-02 |
| C_7H_9+ | 93.08 | 9.08E-03 |
| C_7H_11+ | 95.09 | 1.94E-02 |
| C_8H_19O_2+ | 147.12 | 9.05E-03 |
| C_12H_15+ | 159.12 | 2.06E-03 |
| C_12H_17+ | 161.14 | 1.77E-03 |
| C_13H_5O+ | 177.03 | 8.15E-03 |
| C_9H_12O_4+ | 184.06 | 3.60E-03 |
| C_16H_13O+ | 221.09 | 3.62E-04 |
| 281.14 u | 281.14 | 4.95E-04 |
| 297.23 u | 297.23 | 1.98E-04 |
| 311.19 u | 311.19 | 8.45E-05 |
| 313.25 u | 313.25 | 4.91E-04 |
| 336.28 u | 336.28 | 1.80E-04 |
| 337.24 u | 337.24 | 5.20E-04 |
| 338.29 u | 338.29 | 1.02E-03 |
| 339.27 u | 339.27 | 9.47E-04 |
| 340.27 u | 340.27 | 5.31E-04 |
| 381.29 u | 381.29 | 2.65E-04 |
| 383.31 u | 383.31 | 4.86E-04 |
| 395.30 u | 395.30 | 3.53E-04 |
| 396.30 u | 396.30 | 2.12E-04 |
| 397.30 u | 397.30 | 7.48E-04 |
| 398.30 u | 398.30 | 2.86E-04 |

**Supplementary Table 4.** TOF-SIMS peak assignments for brown IR64 rice in negative mode

| Peak Label | Mass | Area Norm. By Total Ion Intensity |
| --- | --- | --- |
|  |  |  |
| C- | 12.00 | 1.74E-02 |
| CH- | 13.01 | 5.53E-02 |
| CH_2- | 14.02 | 1.06E-02 |
| CH_3- | 15.03 | 3.33E-04 |
| O- | 15.99 | 3.93E-02 |
| OH- | 17.00 | 3.38E-02 |
| F- | 19.00 | 1.91E-03 |
| C_2- | 24.00 | 7.12E-03 |
| C_2H- | 25.01 | 2.91E-02 |
| C_2H_2- | 26.01 | 3.31E-03 |
| C_2H_3- | 27.03 | 4.65E-04 |
| Si- | 27.98 | 9.19E-04 |
| SiH- | 28.98 | 5.23E-04 |
| CHO- | 29.00 | 2.63E-04 |
| SiH_2- | 29.99 | 9.25E-05 |
| CH_3O- | 31.02 | 2.04E-04 |
| O_2- | 31.99 | 1.42E-04 |
| Cl- | 34.97 | 2.12E-04 |
| C_3- | 36.00 | 6.67E-04 |
| ^37Cl- | 36.97 | 6.06E-05 |
| C_3H- | 37.01 | 8.17E-04 |
| C_3H_2- | 38.02 | 1.44E-03 |
| C_3H_3- | 39.03 | 6.80E-04 |
| C_2O- | 39.99 | 2.41E-04 |
| C_3H_4- | 40.02 | 2.05E-04 |
| C_2HO- | 41.01 | 4.63E-03 |
| C_2H_3O- | 43.02 | 3.14E-03 |
| CHO_2- | 45.00 | 9.92E-03 |
| C_4- | 48.00 | 2.04E-04 |
| C_4H- | 49.01 | 1.28E-03 |
| C_4H_3- | 51.03 | 9.50E-04 |
| C_3H_3O- | 55.02 | 1.69E-03 |
| C_2H_2O_2- | 58.01 | 9.54E-03 |
| C_2H_3O_2- | 59.02 | 1.26E-02 |
| C_3H_3O_2- | 71.02 | 1.68E-02 |
| C_2HO_3- | 73.00 | 3.63E-03 |
| C_6HN- | 87.01 | 7.16E-03 |
| C_6H_7O_5- | 159.05 | 1.00E-03 |
| C_6H_9O_5- | 161.06 | 1.23E-03 |
| C_14H_9O- | 193.05 | 1.16E-03 |
| C_16H_13O- | 221.10 | 1.38E-03 |
| 253.21 u | 253.21 | 5.33E-04 |
| C_15H_29NO_2- | 255.22 | 5.31E-03 |
| 256.23 u | 256.23 | 9.82E-04 |
| 277.21 u | 277.21 | 6.28E-04 |
| 279.22 u | 279.22 | 6.66E-03 |
| 280.23 u | 280.23 | 1.38E-03 |
| 281.24 u | 281.24 | 1.01E-02 |
| 282.24 u | 282.24 | 2.06E-03 |
| 283.25 u | 283.25 | 9.09E-04 |
| 309.26 u | 309.26 | 2.02E-04 |
| 311.28 u | 311.28 | 4.18E-04 |
| 336.31 u | 336.31 | 4.10E-04 |
| 337.30 u | 337.30 | 1.87E-04 |
| 339.31 u | 339.31 | 2.70E-04 |
| 367.34 u | 367.34 | 3.82E-04 |
| 368.34 u | 368.34 | 1.10E-04 |
| 383.21 u | 383.21 | 2.27E-04 |
